# Supplementary material
Source: Royal Society of Chemistry journal article supplement (doi:10.1039/d6ta01195k)
Supplement: d6ta01195k1.pdf [file d6ta01195k1.pdf]

### Supporting Information

#### **Graphene-Like Carbon Fibres Derived from Cotton Waste for High-Performance Supercapacitors: Computational and Experimental Investigation**

*Sandeep Pandey<sup>1</sup>, Manoj Karakoti<sup>1,2</sup>, Mayank Pathak<sup>1,3</sup>, Gaurav Tatrari<sup>1,4</sup>, Boddepalli SantiBhusan<sup>5</sup>, Sunil Dhali<sup>1</sup>, Lata Pandey<sup>1</sup>, Monika Matiyani<sup>1,2</sup>, Anurag Srivastava<sup>6</sup>, Nanda Gopal Sahoo<sup>1\*</sup>*

<sup>1</sup> PRS Nanoscience and Nanotechnology Centre, Department of Chemistry, D.S.B. Campus, Kumaun University, Nainital-263001, Uttarakhand, India

<sup>2</sup>Institute of Macromolecular Chemistry, Czech Academy of Sciences, 16200, Prague 6, Czech Republic

<sup>3</sup>Energy Cluster, School of Advanced Engineering, UPES, Dehradun-248 007, Uttarakhand, India

<sup>4</sup> Department of Chemistry, Chemical-Biological Centre, Umeå University, SE-90871, Sweden

<sup>5</sup>Department of Electronics and Communication Engineering, Indian Institute of Information Technology, Allahabad, UP-211015, India

<sup>6</sup>Atal Bihari Vajpayee Indian Institute of Information Technology and Management, Gwalior 474015, Madhya Pradesh, India

\* Corresponding author email: [ngsahoo@yahoo.co.in](mailto:ngsahoo@yahoo.co.in)

**Table S1.** XRD analysis of the GLCFs.

| Peak assignment                              | 2θ (°) | FWHM (°) | d-spacing (nm) | Crystallite size (nm) | Microstrain | Dislocation density (nm <sup>-2</sup> ) |
|----------------------------------------------|--------|----------|----------------|-----------------------|-------------|-----------------------------------------|
| Low-angle disordered/expanded carbon feature | 12.886 | 1.074    | 0.686          | 7.446                 | 0.0415      | 0.0180                                  |
| (002) turbostratic graphitic carbon          | 26.023 | 2.452    | 0.342          | 3.326                 | 0.0463      | 0.0904                                  |
| Sharp minor crystalline/impurity peak        | 32.608 | 1.086    | 0.274          | 7.619                 | 0.0162      | 0.0172                                  |

## Supporting Information

|                                     |        |       |       |        |        |         |
|-------------------------------------|--------|-------|-------|--------|--------|---------|
| (100/101) in-plane graphitic carbon | 41.878 | 1.152 | 0.216 | 15.102 | 0.0131 | 0.00438 |
|-------------------------------------|--------|-------|-------|--------|--------|---------|

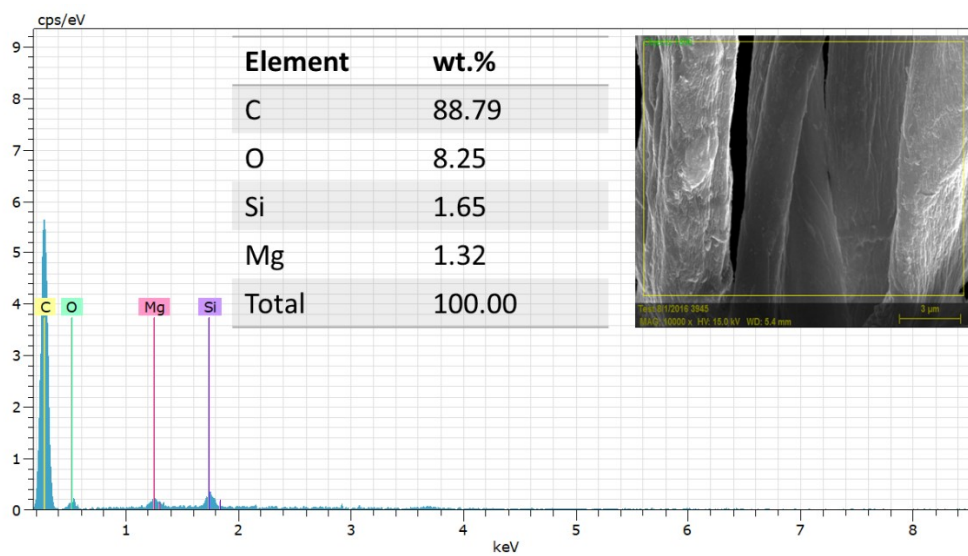

**Figure SI 1.** EDX of GLCFs
